# Supplementary material for: A rainwater control optimization design approach for airports based on a self-organizing feature map neural network model
Source: PLoS One. 2020 Jan 21;15(1):e0227901. doi: 10.1371/journal.pone.0227901 (PMC6974174; doi:10.1371/journal.pone.0227901)
Supplement: S3 File — (XLSX) [file pone.0227901.s003.xlsx]

## Sheet: Sheet1
Area number	Permeable paving area ratio	Green roof area ratio	Sunken green area ratio
N1	0.16	0.35	0.62
N2	0.15	0.32	0.58
N3	0.2	0.43	0.66
N4	0.18	0.38	0.57
N5	0.23	0.3	0.68
N6	0.17	0.39	0.51
